# Supplementary material for: Carbon nanotubes as hole-selective contacts for high-efficiency full-area GaAs hybrid heterojunction solar cells
Source: Royal Society of Chemistry journal article supplement (doi:10.1039/d4ta05391e), 2024-01-01

## Supporting Information

### **Carbon nanotube as hole-selective contact for high-efficiency full-area GaAs hybrid heterojunction solar cells**

Youtian Mo<sup>a,b,c</sup>, Chaoying Guo<sup>a,b</sup>, Jiansen Guo<sup>a,b</sup>, Peixin Liu<sup>a,b</sup>, Xuan Wang<sup>a,b</sup>, Yufan Cai<sup>a,b</sup>,  
Jiaying Chen<sup>a,b</sup>, Xi Deng<sup>a,b</sup>, Wenliang Wang<sup>a,b,\*</sup> and Guoqiang Li<sup>a,b,\*</sup>

<sup>a</sup> State Key Laboratory of Luminescent Materials and Devices, South China University of Technology, Guangzhou 510640, China.

<sup>b</sup> Department of Electronic Materials, School of Materials Science and Engineering, South China University of Technology, Guangzhou 510640, China.

<sup>c</sup> School of Chemistry and Materials Science, Guangdong University of Education, Guangzhou 510303, China.

\* Corresponding author, E-mail: wenliangwang@scut.edu.cn and msgli@scut.edu.cn

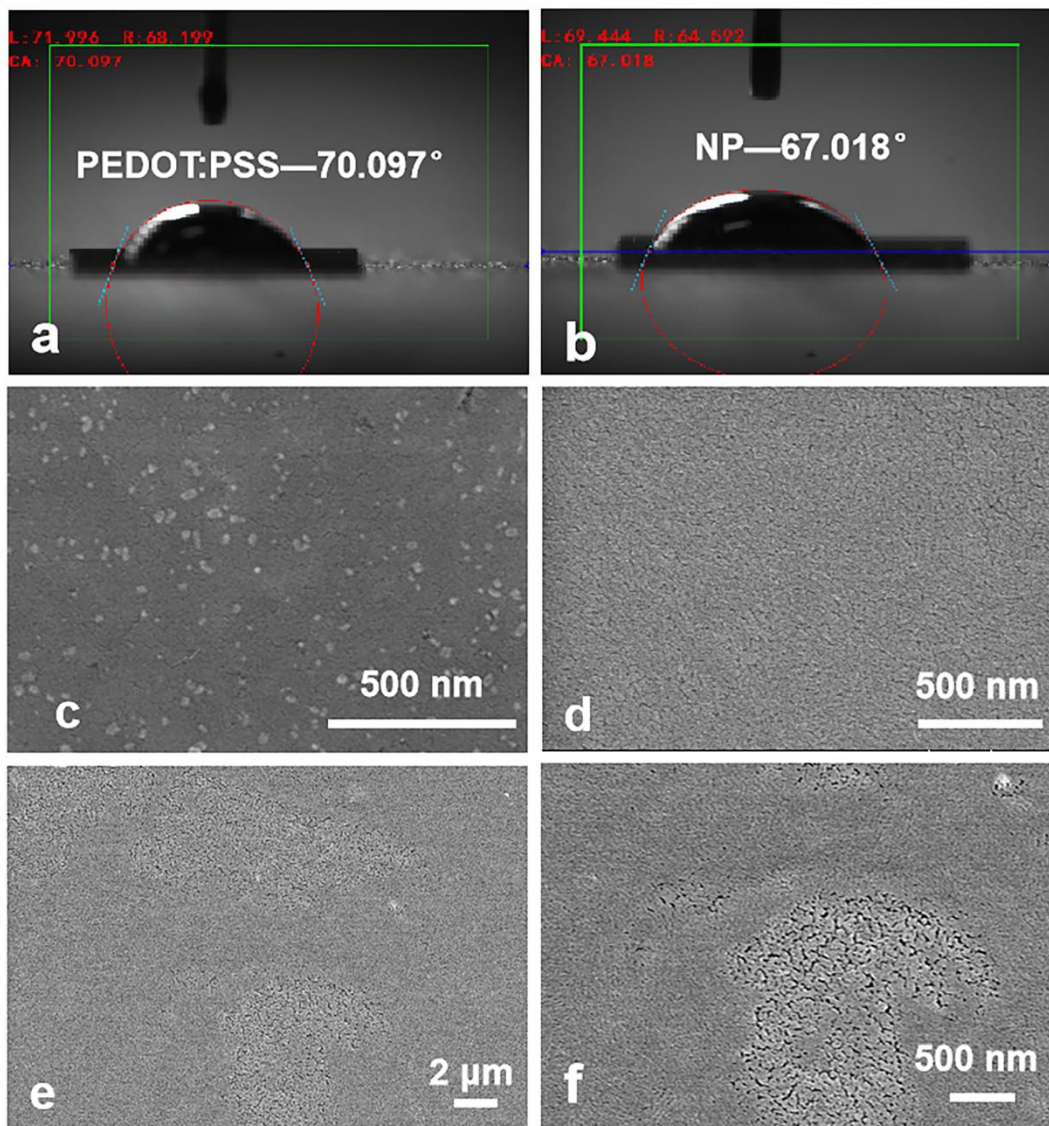

**Fig. S1.** The contact angles of (a) PEDOT:PSS and (b) NP0.05 film. The SEM images of (c) PEDOT:PSS, (d) NPCNT0.05, (e, f) NPCNT0.1 film.

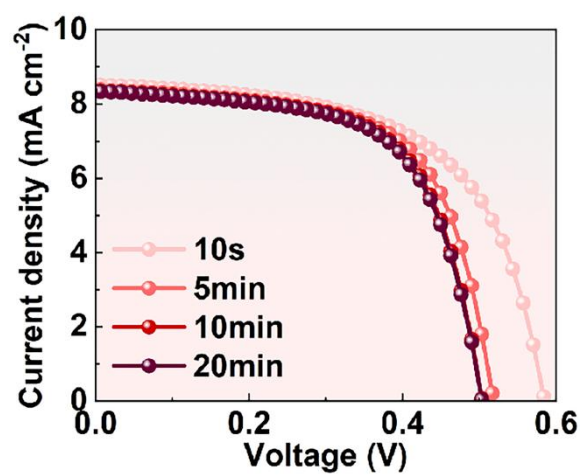

**Fig. S2.** The J-V characteristics of GaAs/NP HJSCs with different annealing times.

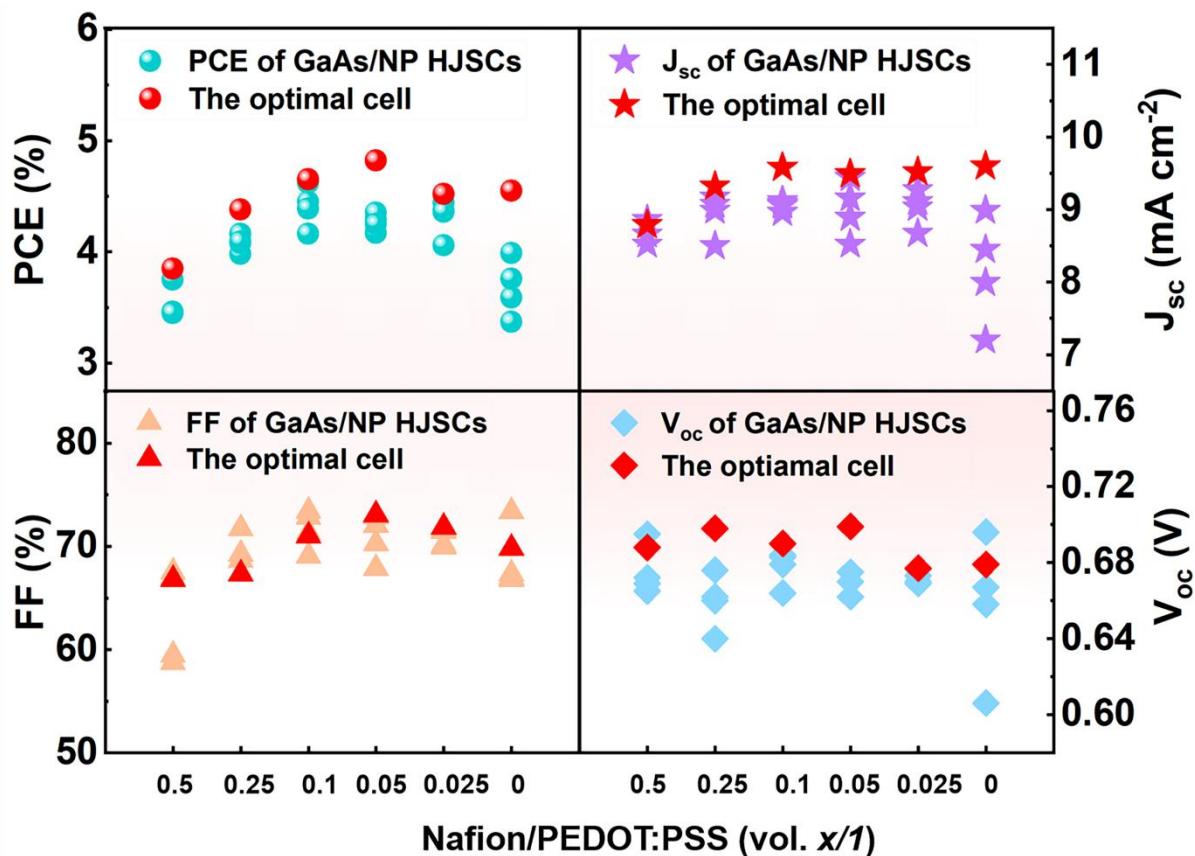

Fig. S3. The J-V characteristics of HJSCs with different ratio of Nafion and PEDOT:PSS.

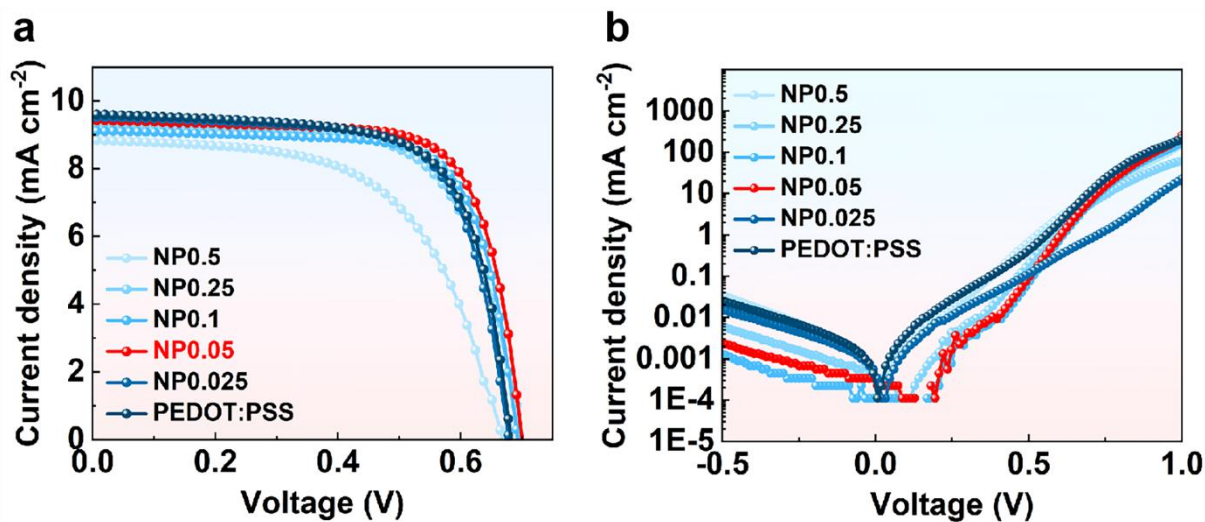

Fig. S4. The J-V characteristics of HJSCs with different ratio of Nafion and PEDOT:PSS under (a) illumination and (b) dark condition.

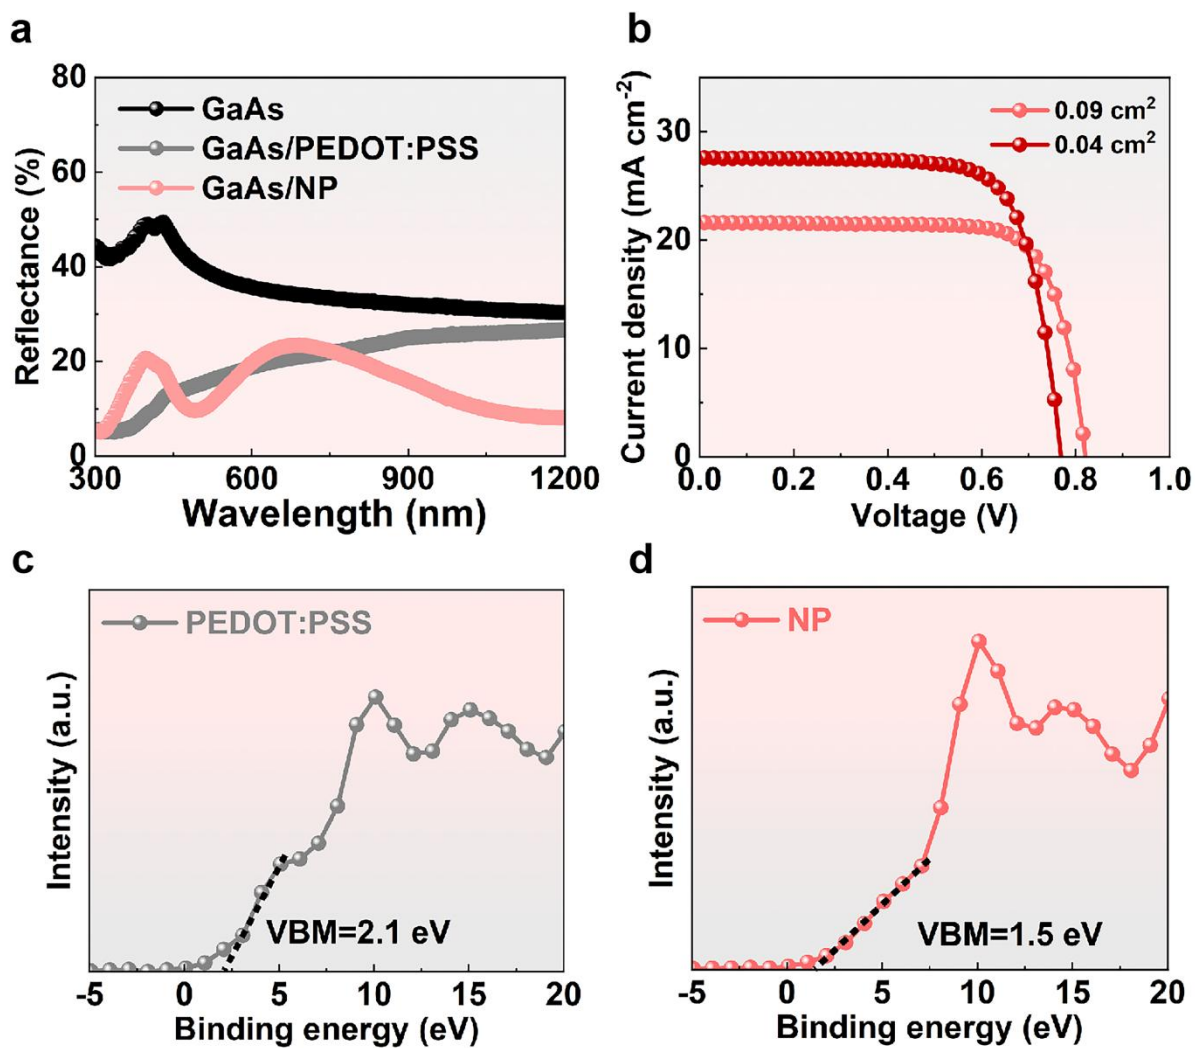

**Fig. S5.** (a) Reflectance spectra of the GaAs, GaAs/PEDOT:PSS and GaAs/NP. (b) J-V curves of GaAs/NP HJSCs with different active area. Valence band spectra of (c) PEDOT:PSS and (d) NP film.

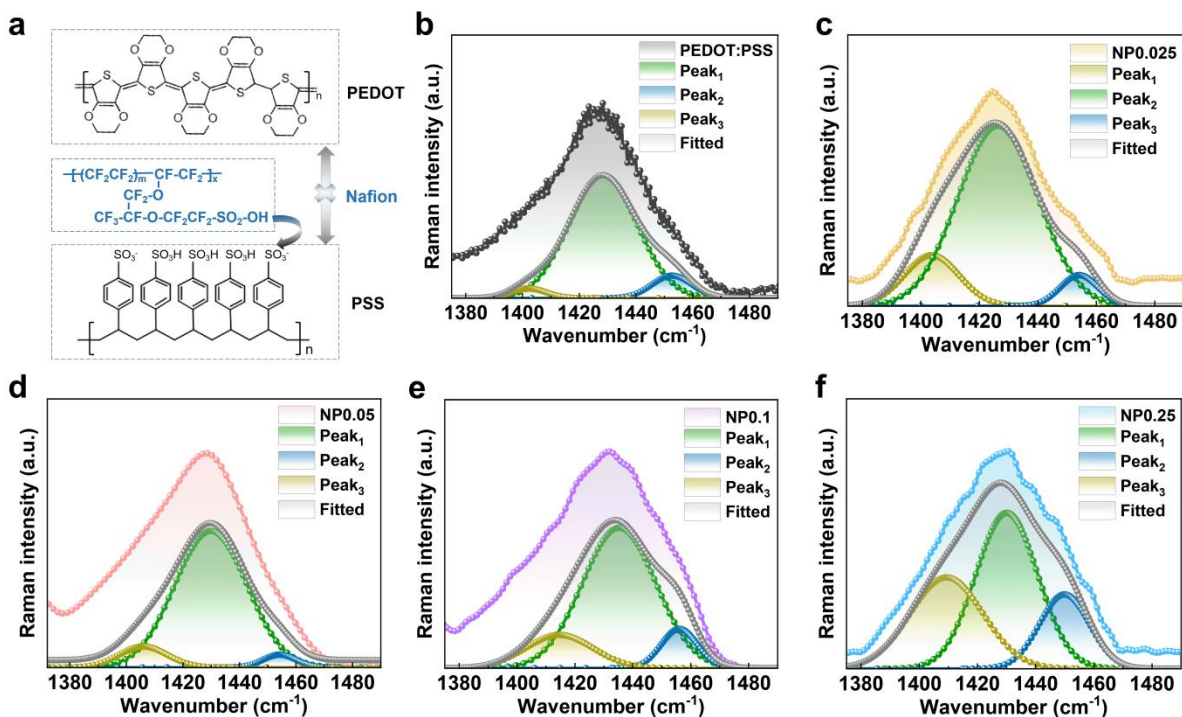

**Fig. S6.** (a) Chemical structures and the possible bonding interaction between PEDOT:PSS and Nafion. Raman analysis of  $C_{\alpha}=C_{\beta}$  symmetric vibration peak for (b) PEDOT:PSS, (c) NP0.025, (d) NP0.05, (e) NP0.1 and (f) NP0.25 films.

Table S1 Integrated intensity ratios for the Raman spectra of NP films with different ratio of Nafion and PEDOT:PSS

| Sample    | Intensity of Benzoid peak ( $I_b$ ) | Intensity of Quinoid peak ( $I_q$ ) | $I_b/I_{total}$ | $I_q/I_{total}$ | $I_b/I_q$ |
|-----------|-------------------------------------|-------------------------------------|-----------------|-----------------|-----------|
| PEDOT:PSS | 256.29                              | 1400.86                             | 0.16            | 0.84            | 0.18      |
| NP0.025   | 31.83                               | 186.10                              | 0.15            | 0.85            | 0.17      |
| NP0.05    | 85.90                               | 916.28                              | 0.09            | 0.91            | 0.09      |
| NP0.1     | 36.57                               | 130.76                              | 0.22            | 0.78            | 0.28      |
| NP0.25    | 22.0                                | 46.17                               | 0.32            | 0.68            | 0.48      |

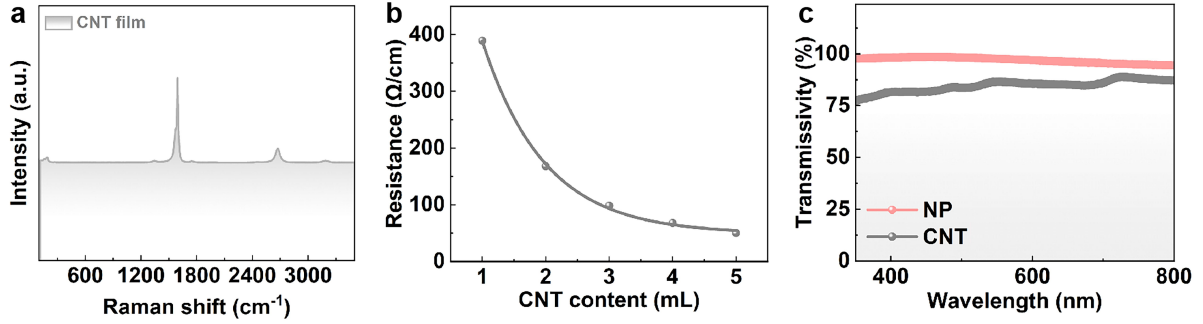

Fig. S7. (a) Raman spectra and (b) resistance versus content of CNT film. (c) Transmissivity spectra of the NP and CNT film.

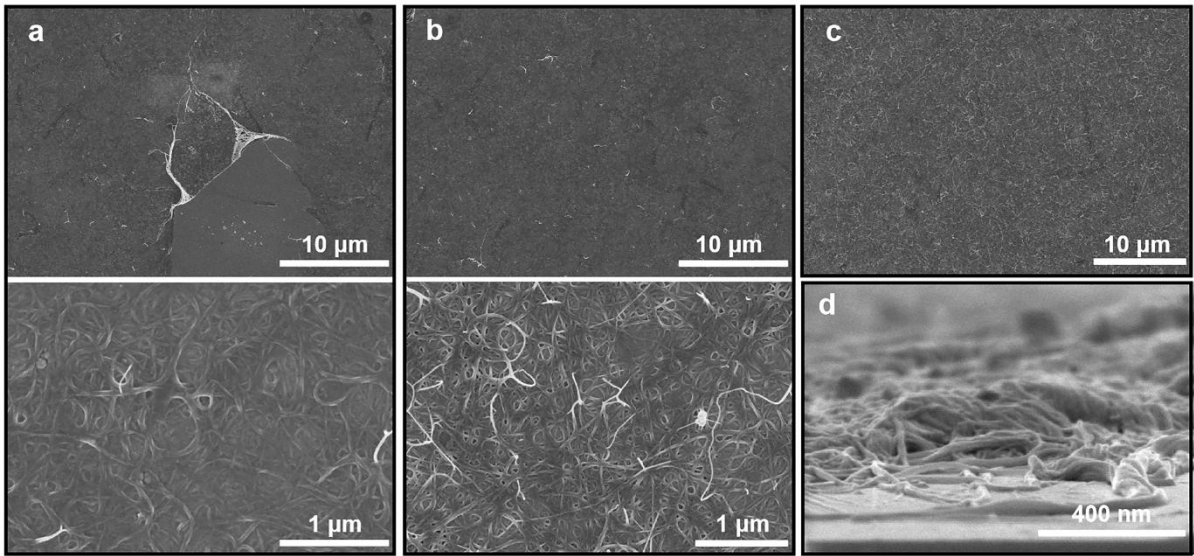

Fig. S8. SEM images of (a) CNT-0.25 mL, (b) CNT-1 mL and (c) CNT-1.5 mL. (d) The cross-sectional SEM image of CNT film.

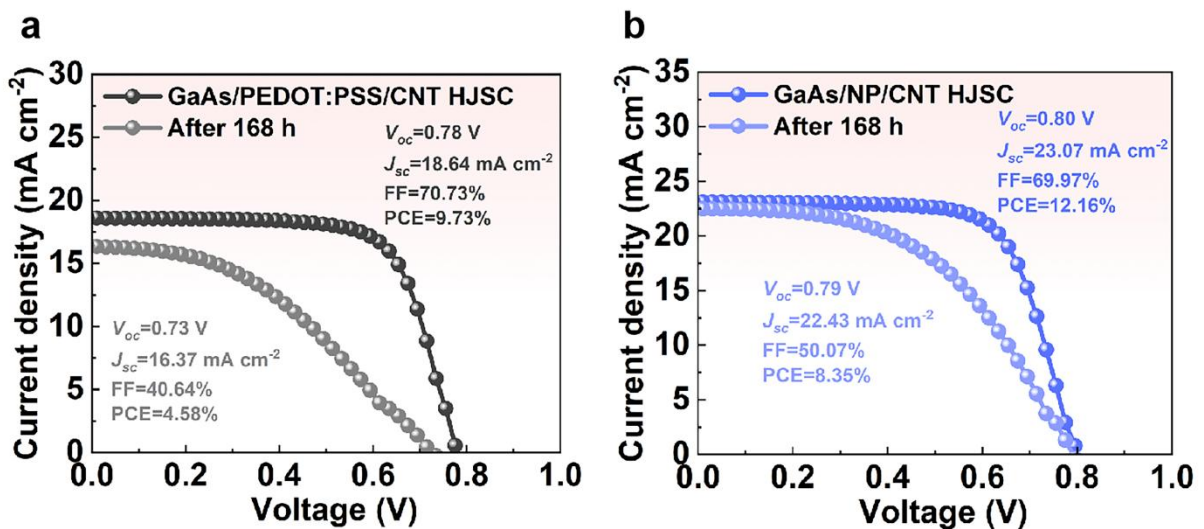

Fig. S9. The J-V characteristics of GaAs/PEDOT:PSS/CNT and GaAs/NP/CNT HJSCs with different ratio of Nafion and PEDOT:PSS at different working period.

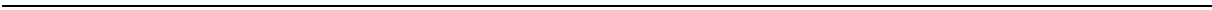

Supplement: d4ta05391e1.pdf [file d4ta05391e1.pdf]
